# Supplementary material
Source: MDPI journal article supplement (https://www.mdpi.com/2311-7524/8/10/892)
Supplement: s1 [file s1]

## Supplementary Figures

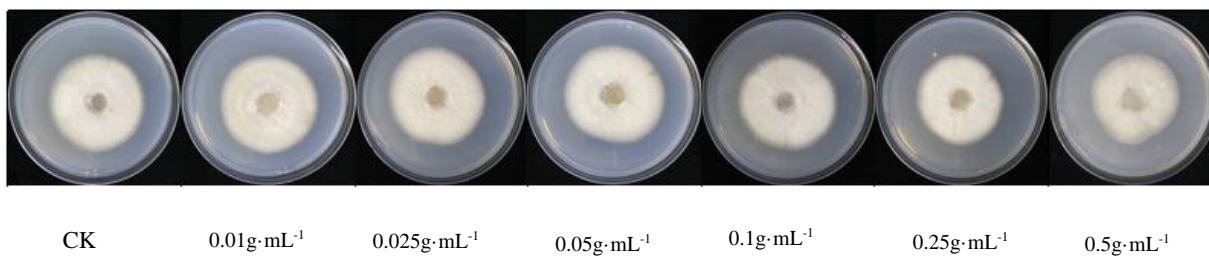

**Supplementary Figure S1.** Antifungal activity of peanut root exudates with different concentrations ( $n=8$ ).

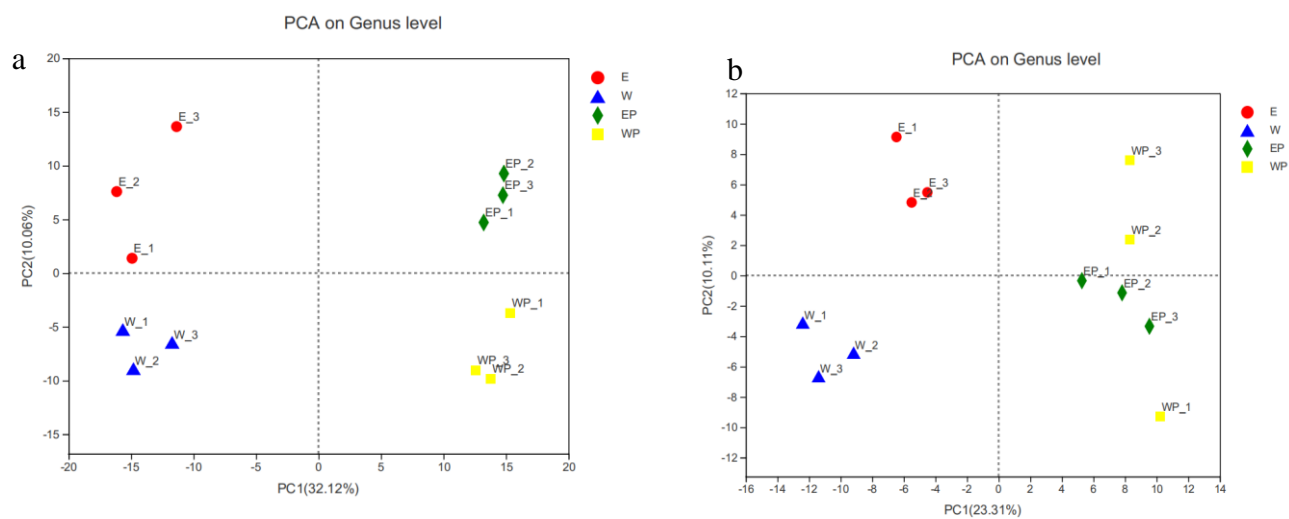

**Supplementary Figure S2.** PCA of microbial communities in grapevine replant soil obtained by applying peanut root exudates or distilled water. a: Bacteria, b: fungi
